# Supplementary material
Source: publisher site journal article supplement (https://www.spandidos-publications.com/4605/downloadSupplementary)
Supplement: Supplementary file 1 [file downloadSupplementary]

## Sheet: Sheet 1
Table SX. KEGG analysis down specific
KEGG_A_class	KEGG_B_class	Pathway	out (61)	All (8312)	Pvalue	Qvalue	Pathway ID	Genes	K_IDs
Human Diseases	Cancers	Endometrial cancer	5	63	9.13831e-05	0.00940224	ko05213	ENSG00000134982;ENSG00000171862;ENSG00000183230;ENSG00000115904;ENSG00000117020	K02085+K01110+K05691+K03099+K04456
Human Diseases	Cancers	Prostate cancer	6	103	0.000100024	0.00940224	ko05215	ENSG00000100393;ENSG00000277893;ENSG00000171862;ENSG00000111276;ENSG00000115904;ENSG00000117020	K04498+K12344+K01110+K06624+K03099+K04456
Environmental Information Processing	Signal transduction	FoxO signaling pathway	6	139	0.00051207	0.0320898	ko04068	ENSG00000213923;ENSG00000100393;ENSG00000171862;ENSG00000111276;ENSG00000115904;ENSG00000117020	K08960+K04498+K01110+K06624+K03099+K04456
Human Diseases	Cancers	Gastric cancer	6	153	0.000849785	0.0399399	ko05226	ENSG00000134982;ENSG00000183230;ENSG00000138675;ENSG00000111276;ENSG00000115904;ENSG00000117020	K02085+K05691+K04358+K06624+K03099+K04456
Human Diseases	Cancers	Breast cancer	5	156	0.00557831	0.180777	ko05224	ENSG00000134982;ENSG00000171862;ENSG00000138675;ENSG00000115904;ENSG00000117020	K02085+K01110+K04358+K03099+K04456
Metabolism	Amino acid metabolism	Valine, leucine and isoleucine degradation	3	50	0.00576949	0.180777	ko00280	ENSG00000138029;ENSG00000131844;ENSG00000137992	K07509+K01969+K09699
Human Diseases	Endocrine and metabolic diseases	AGE-RAGE signaling pathway in diabetic complications	4	103	0.00675796	0.181499	ko04933	ENSG00000125538;ENSG00000120738;ENSG00000111276;ENSG00000117020	K04519+K09203+K06624+K04456
Human Diseases	Cancers	MicroRNAs in cancer	5	176	0.00919097	0.215988	ko05206	ENSG00000100393;ENSG00000134982;ENSG00000171862;ENSG00000111276;ENSG00000115904	K04498+K02085+K01110+K06624+K03099
Organismal Systems	Endocrine system	Growth hormone synthesis, secretion and action	4	124	0.0127985	0.235489	ko04935	ENSG00000100393;ENSG00000157005;ENSG00000115904;ENSG00000117020	K04498+K05237+K03099+K04456
Metabolism	Glycan biosynthesis and metabolism	Glycosaminoglycan biosynthesis - heparan sulfate / heparin	2	26	0.015376	0.235489	ko00534	ENSG00000002587;ENSG00000249853	K01024+K08104
Human Diseases	Cancers	Central carbon metabolism in cancer	3	74	0.0168568	0.235489	ko05230	ENSG00000140538;ENSG00000171862;ENSG00000117020	K05101+K01110+K04456
Human Diseases	Cancers	Renal cell carcinoma	3	75	0.0174691	0.235489	ko05211	ENSG00000100393;ENSG00000115904;ENSG00000117020	K04498+K03099+K04456
Human Diseases	Cancers	Melanoma	3	76	0.0180936	0.235489	ko05218	ENSG00000171862;ENSG00000138675;ENSG00000117020	K01110+K04358+K04456
Human Diseases	Cancers	Pathways in cancer	9	552	0.0184391	0.235489	ko05200	ENSG00000100393;ENSG00000134982;ENSG00000047410;ENSG00000171862;ENSG00000183230;ENSG00000138675;ENSG00000111276;ENSG00000115904;ENSG00000117020	K04498+K02085+K09291+K01110+K05691+K04358+K06624+K03099+K04456
Human Diseases	Cancers	Glioma	3	79	0.0200416	0.235489	ko05214	ENSG00000171862;ENSG00000115904;ENSG00000117020	K01110+K03099+K04456
Human Diseases	Cancers	Chronic myeloid leukemia	3	79	0.0200416	0.235489	ko05220	ENSG00000111276;ENSG00000115904;ENSG00000117020	K06624+K03099+K04456
Human Diseases	Drug resistance	EGFR tyrosine kinase inhibitor resistance	3	85	0.0242726	0.267058	ko01521	ENSG00000171862;ENSG00000115904;ENSG00000117020	K01110+K03099+K04456
Environmental Information Processing	Signal transduction	ErbB signaling pathway	3	88	0.0265559	0.267058	ko04012	ENSG00000111276;ENSG00000115904;ENSG00000117020	K06624+K03099+K04456
Human Diseases	Neurodegenerative diseases	Prion diseases	2	35	0.0269899	0.267058	ko05020	ENSG00000125538;ENSG00000120738	K04519+K09203
Human Diseases	Cancers	Colorectal cancer	3	94	0.0314569	0.278365	ko05210	ENSG00000134982;ENSG00000115904;ENSG00000117020	K02085+K03099+K04456
Human Diseases	Cancers	Small cell lung cancer	3	94	0.0314569	0.278365	ko05222	ENSG00000171862;ENSG00000111276;ENSG00000117020	K01110+K06624+K04456
Genetic Information Processing	Translation	RNA transport	4	165	0.0325747	0.278365	ko03013	ENSG00000111196;ENSG00000058804;ENSG00000047410;ENSG00000156508	K12877+K14315+K09291+K03231
Human Diseases	Cancers	Hepatocellular carcinoma	4	172	0.0371042	0.303287	ko05225	ENSG00000134982;ENSG00000171862;ENSG00000115904;ENSG00000117020	K02085+K01110+K03099+K04456
Human Diseases	Infectious diseases	Human papillomavirus infection	6	346	0.0404766	0.30356	ko05165	ENSG00000100393;ENSG00000134982;ENSG00000171862;ENSG00000111276;ENSG00000115904;ENSG00000117020	K04498+K02085+K01110+K06624+K03099+K04456
Human Diseases	Drug resistance	Endocrine resistance	3	104	0.0406076	0.30356	ko01522	ENSG00000111276;ENSG00000115904;ENSG00000117020	K06624+K03099+K04456
Human Diseases	Infectious diseases	Influenza A	4	179	0.0419816	0.30356	ko05164	ENSG00000100393;ENSG00000153802;ENSG00000125538;ENSG00000117020	K04498+K09641+K04519+K04456
Human Diseases	Endocrine and metabolic diseases	Insulin resistance	3	114	0.0509598	0.354831	ko04931	ENSG00000171862;ENSG00000198380;ENSG00000117020	K01110+K00820+K04456
Environmental Information Processing	Signal transduction	Hedgehog signaling pathway	2	51	0.0536937	0.360437	ko04340	ENSG00000213923;ENSG00000151292	K08960+K08958
Metabolism	Metabolism of cofactors and vitamins	Riboflavin metabolism	1	8	0.0572477	0.360437	ko00740	ENSG00000135002	K00861
Environmental Information Processing	Signal transduction	HIF-1 signaling pathway	3	121	0.0588987	0.360437	ko04066	ENSG00000100393;ENSG00000111276;ENSG00000117020	K04498+K06624+K04456
Genetic Information Processing	Replication and repair	Fanconi anemia pathway	2	54	0.0594338	0.360437	ko03460	ENSG00000162607;ENSG00000144554	K11832+K10891
Cellular Processes	Cellular community - eukaryotes	Focal adhesion	4	205	0.0631446	0.369774	ko04510	ENSG00000105974;ENSG00000171862;ENSG00000115904;ENSG00000117020	K06278+K01110+K03099+K04456
Organismal Systems	Nervous system	Neurotrophin signaling pathway	3	126	0.0649072	0.369774	ko04722	ENSG00000140538;ENSG00000115904;ENSG00000117020	K05101+K03099+K04456
Human Diseases	Infectious diseases	Legionellosis	2	58	0.0673995	0.372679	ko05134	ENSG00000125538;ENSG00000156508	K04519+K03231
Environmental Information Processing	Signal transduction	MAPK signaling pathway	5	304	0.0714981	0.384047	ko04010	ENSG00000166862;ENSG00000125538;ENSG00000138675;ENSG00000115904;ENSG00000117020	K04867+K04519+K04358+K03099+K04456
Environmental Information Processing	Signal transduction	Apelin signaling pathway	3	141	0.0845393	0.417598	ko04371	ENSG00000198838;ENSG00000120738;ENSG00000117020	K04963+K09203+K04456
Human Diseases	Cardiovascular diseases	Fluid shear stress and atherosclerosis	3	142	0.0859301	0.417598	ko05418	ENSG00000125538;ENSG00000105974;ENSG00000117020	K04519+K06278+K04456
Human Diseases	Infectious diseases	HTLV-I infection	4	231	0.0889947	0.417598	ko05166	ENSG00000100393;ENSG00000171862;ENSG00000120738;ENSG00000117020	K04498+K01110+K09203+K04456
Human Diseases	Cancers	Non-small cell lung cancer	2	70	0.0931923	0.417598	ko05223	ENSG00000115904;ENSG00000117020	K03099+K04456
Cellular Processes	Transport and catabolism	Autophagy - animal	3	149	0.0959375	0.417598	ko04140	ENSG00000155961;ENSG00000171862;ENSG00000117020	K07925+K01110+K04456
Cellular Processes	Cellular community - eukaryotes	Signaling pathways regulating pluripotency of stem cells	3	150	0.0974051	0.417598	ko04550	ENSG00000134982;ENSG00000140836;ENSG00000117020	K02085+K09378+K04456
Human Diseases	Infectious diseases	Measles	3	150	0.0974051	0.417598	ko05162	ENSG00000125538;ENSG00000111276;ENSG00000117020	K04519+K06624+K04456
Cellular Processes	Cellular community - eukaryotes	Adherens junction	2	72	0.0977356	0.417598	ko04520	ENSG00000100393;ENSG00000183230	K04498+K05691
Human Diseases	Cancers	Acute myeloid leukemia	2	72	0.0977356	0.417598	ko05221	ENSG00000115904;ENSG00000117020	K03099+K04456
Metabolism	Carbohydrate metabolism	Inositol phosphate metabolism	2	75	0.104666	0.430688	ko00562	ENSG00000204084;ENSG00000171862	K01099+K01110
Human Diseases	Infectious diseases	Bacterial invasion of epithelial cells	2	77	0.10936	0.430688	ko05100	ENSG00000105974;ENSG00000183230	K06278+K05691
Environmental Information Processing	Signal transduction	Hippo signaling pathway	3	159	0.111021	0.430688	ko04390	ENSG00000213923;ENSG00000134982;ENSG00000183230	K08960+K02085+K05691
Organismal Systems	Endocrine system	Prolactin signaling pathway	2	78	0.111728	0.430688	ko04917	ENSG00000115904;ENSG00000117020	K03099+K04456
Human Diseases	Cardiovascular diseases	Arrhythmogenic right ventricular cardiomyopathy (ARVC)	2	79	0.11411	0.430688	ko05412	ENSG00000166862;ENSG00000183230	K04867+K05691
Environmental Information Processing	Signal transduction	mTOR signaling pathway	3	163	0.117299	0.430688	ko04150	ENSG00000171862;ENSG00000115904;ENSG00000117020	K01110+K03099+K04456
Human Diseases	Infectious diseases	Tuberculosis	4	257	0.11921	0.430688	ko05152	ENSG00000260314;ENSG00000100393;ENSG00000125538;ENSG00000117020	K06560+K04498+K04519+K04456
Human Diseases	Neurodegenerative diseases	Alzheimer disease	5	359	0.122376	0.430688	ko05010	ENSG00000213923;ENSG00000134982;ENSG00000125538;ENSG00000198838;ENSG00000117020	K08960+K02085+K04519+K04963+K04456
Environmental Information Processing	Signal transduction	Wnt signaling pathway	3	167	0.123708	0.430688	ko04310	ENSG00000213923;ENSG00000100393;ENSG00000134982	K08960+K04498+K02085
Human Diseases	Infectious diseases	Hepatitis B	3	167	0.123708	0.430688	ko05161	ENSG00000100393;ENSG00000115904;ENSG00000117020	K04498+K03099+K04456
Environmental Information Processing	Signal transduction	Jak-STAT signaling pathway	3	171	0.130245	0.4452	ko04630	ENSG00000100393;ENSG00000115904;ENSG00000117020	K04498+K03099+K04456
Organismal Systems	Endocrine system	GnRH signaling pathway	2	94	0.151252	0.507775	ko04912	ENSG00000120738;ENSG00000115904	K09203+K03099
Metabolism	Lipid metabolism	Steroid biosynthesis	1	23	0.156031	0.51463	ko00100	ENSG00000160285	K01852
Genetic Information Processing	Translation	mRNA surveillance pathway	2	99	0.164125	0.522973	ko03015	ENSG00000111196;ENSG00000177613	K12877+K14407
Human Diseases	Cancer: overview	PD-L1 expression and PD-1 checkpoint pathway in cancer	2	99	0.164125	0.522973	ko05235	ENSG00000171862;ENSG00000117020	K01110+K04456
Environmental Information Processing	Signal transduction	Phosphatidylinositol signaling system	2	102	0.171942	0.537632	ko04070	ENSG00000204084;ENSG00000171862	K01099+K01110
Human Diseases	Cancers	Choline metabolism in cancer	2	107	0.185106	0.537632	ko05231	ENSG00000115904;ENSG00000117020	K03099+K04456
Metabolism	Lipid metabolism	Fatty acid elongation	1	28	0.186639	0.537632	ko00062	ENSG00000138029	K07509
Organismal Systems	Immune system	Toll-like receptor signaling pathway	2	108	0.187757	0.537632	ko04620	ENSG00000125538;ENSG00000117020	K04519+K04456
Organismal Systems	Immune system	C-type lectin receptor signaling pathway	2	108	0.187757	0.537632	ko04625	ENSG00000125538;ENSG00000117020	K04519+K04456
Organismal Systems	Endocrine system	Glucagon signaling pathway	2	109	0.190413	0.537632	ko04922	ENSG00000100393;ENSG00000117020	K04498+K04456
Human Diseases	Infectious diseases	Chagas disease (American trypanosomiasis)	2	109	0.190413	0.537632	ko05142	ENSG00000125538;ENSG00000117020	K04519+K04456
Environmental Information Processing	Signal transduction	Hippo signaling pathway - multiple species	1	29	0.192629	0.537632	ko04392	ENSG00000213923	K08960
Organismal Systems	Immune system	T cell receptor signaling pathway	2	111	0.195742	0.537632	ko04660	ENSG00000115904;ENSG00000117020	K03099+K04456
Human Diseases	Cancers	Proteoglycans in cancer	3	212	0.20335	0.537632	ko05205	ENSG00000105974;ENSG00000115904;ENSG00000117020	K06278+K03099+K04456
Environmental Information Processing	Signal transduction	TNF signaling pathway	2	114	0.203771	0.537632	ko04668	ENSG00000125538;ENSG00000117020	K04519+K04456
Human Diseases	Drug resistance	Antifolate resistance	1	31	0.204477	0.537632	ko01523	ENSG00000125538	K04519
Metabolism	Glycan biosynthesis and metabolism	Mucin type O-glycan biosynthesis	1	32	0.210337	0.537632	ko00512	ENSG00000144278	K00710
Organismal Systems	Environmental adaptation	Circadian rhythm	1	32	0.210337	0.537632	ko04710	ENSG00000213923	K08960
Cellular Processes	Cell motility	Regulation of actin cytoskeleton	3	221	0.220564	0.537632	ko04810	ENSG00000134982;ENSG00000138675;ENSG00000115904	K02085+K04358+K03099
Environmental Information Processing	Signal transduction	cAMP signaling pathway	3	223	0.224432	0.537632	ko04024	ENSG00000100393;ENSG00000157005;ENSG00000117020	K04498+K05237+K04456
Environmental Information Processing	Signal transduction	PI3K-Akt signaling pathway	5	445	0.226901	0.537632	ko04151	ENSG00000171862;ENSG00000138675;ENSG00000111276;ENSG00000115904;ENSG00000117020	K01110+K04358+K06624+K03099+K04456
Metabolism	Carbohydrate metabolism	Propanoate metabolism	1	36	0.233356	0.537632	ko00640	ENSG00000137992	K09699
Human Diseases	Immune diseases	Graft-versus-host disease	1	36	0.233356	0.537632	ko05332	ENSG00000125538	K04519
Environmental Information Processing	Signal transduction	Sphingolipid signaling pathway	2	125	0.233498	0.537632	ko04071	ENSG00000171862;ENSG00000117020	K01110+K04456
Environmental Information Processing	Signal transduction	AMPK signaling pathway	2	126	0.236218	0.537632	ko04152	ENSG00000117020;ENSG00000084733	K04456+K07903
Human Diseases	Infectious disease: bacterial	Yersinia infection	2	128	0.241662	0.537632	ko05135	ENSG00000125538;ENSG00000117020	K04519+K04456
Human Diseases	Infectious diseases	Herpes simplex infection	6	573	0.242361	0.537632	ko05168	ENSG00000197044;ENSG00000237440;ENSG00000125538;ENSG00000197008;ENSG00000185947;ENSG00000117020	K09228+K09228+K04519+K09228+K09228+K04456
Cellular Processes	Cell growth and death	Cell cycle	2	129	0.244387	0.537632	ko04110	ENSG00000100393;ENSG00000111276	K04498+K06624
Organismal Systems	Endocrine system	Thyroid hormone signaling pathway	2	129	0.244387	0.537632	ko04919	ENSG00000100393;ENSG00000117020	K04498+K04456
Human Diseases	Cancers	Thyroid cancer	1	38	0.244616	0.537632	ko05216	ENSG00000047410	K09291
Human Diseases	Infectious diseases	Human cytomegalovirus infection	3	234	0.245938	0.537632	ko05163	ENSG00000125538;ENSG00000115904;ENSG00000117020	K04519+K03099+K04456
Organismal Systems	Development	Osteoclast differentiation	2	133	0.255299	0.5447	ko04380	ENSG00000125538;ENSG00000117020	K04519+K04456
Metabolism	Amino acid metabolism	Alanine, aspartate and glutamate metabolism	1	40	0.255714	0.5447	ko00250	ENSG00000198380	K00820
Metabolism	Nucleotide metabolism	Purine metabolism	2	135	0.26076	0.5447	ko00230	ENSG00000196839;ENSG00000170502	K01488+K13988
Organismal Systems	Endocrine system	Relaxin signaling pathway	2	135	0.26076	0.5447	ko04926	ENSG00000115904;ENSG00000117020	K03099+K04456
Organismal Systems	Immune system	Fc epsilon RI signaling pathway	2	141	0.277153	0.55958	ko04664	ENSG00000115904;ENSG00000117020	K03099+K04456
Organismal Systems	Endocrine system	Estrogen signaling pathway	2	141	0.277153	0.55958	ko04915	ENSG00000115904;ENSG00000117020	K03099+K04456
Environmental Information Processing	Signal transduction	Ras signaling pathway	3	250	0.277783	0.55958	ko04014	ENSG00000138675;ENSG00000115904;ENSG00000117020	K04358+K03099+K04456
Human Diseases	Infectious diseases	Shigellosis	3	251	0.27979	0.55958	ko05131	ENSG00000125538;ENSG00000153113;ENSG00000117020	K04519+K04281+K04456
Metabolism	Lipid metabolism	Fatty acid degradation	1	46	0.288054	0.561765	ko00071	ENSG00000138029	K07509
Organismal Systems	Endocrine system	Insulin signaling pathway	2	145	0.288077	0.561765	ko04910	ENSG00000115904;ENSG00000117020	K03099+K04456
Cellular Processes	Transport and catabolism	Endocytosis	3	256	0.289847	0.561765	ko04144	ENSG00000151693;ENSG00000105974;ENSG00000084733	K12488+K06278+K07903
Metabolism	Glycan biosynthesis and metabolism	Other types of O-glycan biosynthesis	1	47	0.293308	0.562094	ko00514	ENSG00000144278	K00710
Human Diseases	Endocrine and metabolic diseases	Type I diabetes mellitus	1	48	0.298523	0.562094	ko04940	ENSG00000125538	K04519
Human Diseases	Infectious diseases	Leishmaniasis	2	149	0.298986	0.562094	ko05140	ENSG00000125538;ENSG00000156508	K04519+K03231
Organismal Systems	Circulatory system	Adrenergic signaling in cardiomyocytes	2	152	0.307154	0.569238	ko04261	ENSG00000166862;ENSG00000117020	K04867+K04456
Organismal Systems	Digestive system	Carbohydrate digestion and absorption	1	50	0.308842	0.569238	ko04973	ENSG00000117020	K04456
Metabolism	Carbohydrate metabolism	Amino sugar and nucleotide sugar metabolism	1	51	0.313945	0.569974	ko00520	ENSG00000198380	K00820
Organismal Systems	Immune system	B cell receptor signaling pathway	2	155	0.315305	0.569974	ko04662	ENSG00000115904;ENSG00000117020	K03099+K04456
Metabolism	Amino acid metabolism	Arginine and proline metabolism	1	52	0.31901	0.571181	ko00330	ENSG00000002549	K11142
Organismal Systems	Endocrine system	Oxytocin signaling pathway	2	159	0.326143	0.578442	ko04921	ENSG00000166862;ENSG00000198838	K04867+K04963
Human Diseases	Infectious diseases	Malaria	1	55	0.333989	0.580462	ko05144	ENSG00000125538	K04519
Human Diseases	Endocrine and metabolic diseases	Cushing syndrome	2	163	0.33694	0.580462	ko04934	ENSG00000134982;ENSG00000111276	K02085+K06624
Human Diseases	Infectious diseases	Hepatitis C	2	163	0.33694	0.580462	ko05160	ENSG00000115904;ENSG00000117020	K03099+K04456
Human Diseases	Endocrine and metabolic diseases	Non-alcoholic fatty liver disease (NAFLD)	2	164	0.339632	0.580462	ko04932	ENSG00000125538;ENSG00000117020	K04519+K04456
Cellular Processes	Cell growth and death	Cellular senescence	2	166	0.345006	0.581517	ko04218	ENSG00000171862;ENSG00000117020	K01110+K04456
Human Diseases	Immune diseases	Rheumatoid arthritis	2	167	0.347689	0.581517	ko05323	ENSG00000102524;ENSG00000125538	K05476+K04519
Metabolism	Global and overview maps	Fatty acid metabolism	1	59	0.353456	0.581517	ko01212	ENSG00000138029	K07509
Environmental Information Processing	Signal transduction	Notch signaling pathway	1	59	0.353456	0.581517	ko04330	ENSG00000100393	K04498
Organismal Systems	Immune system	Fc gamma R-mediated phagocytosis	2	170	0.355715	0.581517	ko04666	ENSG00000151693;ENSG00000117020	K12488+K04456
Metabolism	Metabolism of other amino acids	Glutathione metabolism	1	61	0.362979	0.58576	ko00480	ENSG00000002549	K11142
Environmental Information Processing	Signal transduction	VEGF signaling pathway	1	63	0.372364	0.58576	ko04370	ENSG00000117020	K04456
Organismal Systems	Endocrine system	Regulation of lipolysis in adipocyte	1	63	0.372364	0.58576	ko04923	ENSG00000117020	K04456
Environmental Information Processing	Signal transduction	NF-kappa B signaling pathway	2	178	0.376952	0.58576	ko04064	ENSG00000102524;ENSG00000125538	K05476+K04519
Organismal Systems	Immune system	Cytosolic DNA-sensing pathway	1	64	0.377005	0.58576	ko04623	ENSG00000125538	K04519
Human Diseases	Cancers	Basal cell carcinoma	1	64	0.377005	0.58576	ko05217	ENSG00000134982	K02085
Metabolism	Lipid metabolism	Steroid hormone biosynthesis	1	65	0.381612	0.588058	ko00140	ENSG00000277893	K12344
Organismal Systems	Endocrine system	GnRH secretion	1	67	0.390727	0.588997	ko04929	ENSG00000117020	K04456
Metabolism	Metabolism of cofactors and vitamins	Retinol metabolism	1	68	0.395235	0.588997	ko00830	ENSG00000116745	K11158
Organismal Systems	Aging	Longevity regulating pathway - multiple species	1	68	0.395235	0.588997	ko04213	ENSG00000117020	K04456
Organismal Systems	Nervous system	Long-term potentiation	1	69	0.39971	0.588997	ko04720	ENSG00000100393	K04498
Organismal Systems	Development	Axon guidance	2	187	0.400509	0.588997	ko04360	ENSG00000169855;ENSG00000145242	K06753+K05106
Organismal Systems	Endocrine system	Adipocytokine signaling pathway	1	70	0.404152	0.588997	ko04920	ENSG00000117020	K04456
Human Diseases	Immune diseases	Inflammatiory bowel disease (IBD)	1	70	0.404152	0.588997	ko05321	ENSG00000125538	K04519
Cellular Processes	Cell growth and death	p53 signaling pathway	1	72	0.41294	0.597174	ko04115	ENSG00000171862	K01110
Human Diseases	Infectious diseases	Kaposi sarcoma-associated herpesvirus infection	2	194	0.418554	0.600673	ko05167	ENSG00000100393;ENSG00000117020	K04498+K04456
Human Diseases	Drug resistance	Platinum drug resistance	1	75	0.425883	0.602459	ko01524	ENSG00000117020	K04456
Organismal Systems	Immune system	Chemokine signaling pathway	2	197	0.426208	0.602459	ko04062	ENSG00000115904;ENSG00000117020	K03099+K04456
Organismal Systems	Digestive system	Gastric acid secretion	1	77	0.434355	0.609394	ko04971	ENSG00000157005	K05237
Human Diseases	Infectious diseases	Pertussis	1	78	0.438545	0.610715	ko05133	ENSG00000125538	K04519
Genetic Information Processing	Translation	Ribosome biogenesis in eukaryotes	1	79	0.442705	0.611974	ko03008	ENSG00000107937	K06943
Human Diseases	Cancers	Pancreatic cancer	1	81	0.450933	0.618798	ko05212	ENSG00000117020	K04456
Human Diseases	Cancers	Viral carcinogenesis	2	209	0.456301	0.621628	ko05203	ENSG00000100393;ENSG00000111276	K04498+K06624
Cellular Processes	Transport and catabolism	Peroxisome	1	86	0.470984	0.62949	ko04146	ENSG00000114757	K13342
Metabolism	Global and overview maps	Metabolic pathways	12	1554	0.473819	0.62949	ko01100	ENSG00000196839;ENSG00000160285;ENSG00000135002;ENSG00000204084;ENSG00000138029;ENSG00000170502;ENSG00000144278;ENSG00000171862;ENSG00000002549;ENSG00000131844;ENSG00000198380;ENSG00000137992	K01488+K01852+K00861+K01099+K07509+K13988+K00710+K01110+K11142+K01969+K00820+K09699
Organismal Systems	Circulatory system	Cardiac muscle contraction	1	91	0.490314	0.62949	ko04260	ENSG00000166862	K04867
Organismal Systems	Endocrine system	Insulin secretion	1	91	0.490314	0.62949	ko04911	ENSG00000186472	K16882
Human Diseases	Infectious diseases	Salmonella infection	2	224	0.492655	0.62949	ko05132	ENSG00000125538;ENSG00000117020	K04519+K04456
Human Diseases	Infectious disease: viral	Human immunodeficiency virus 1 infection	2	225	0.495026	0.62949	ko05170	ENSG00000128383;ENSG00000117020	K18750+K04456
Environmental Information Processing	Signal transduction	Rap1 signaling pathway	2	226	0.49739	0.62949	ko04015	ENSG00000138675;ENSG00000117020	K04358+K04456
Cellular Processes	Cellular community - eukaryotes	Gap junction	1	93	0.497851	0.62949	ko04540	ENSG00000115904	K03099
Organismal Systems	Digestive system	Salivary secretion	1	93	0.497851	0.62949	ko04970	ENSG00000198838	K04963
Human Diseases	Cardiovascular diseases	Hypertrophic cardiomyopathy (HCM)	1	93	0.497851	0.62949	ko05410	ENSG00000166862	K04867
Environmental Information Processing	Signal transduction	Phospholipase D signaling pathway	2	229	0.504441	0.62949	ko04072	ENSG00000115904;ENSG00000117020	K03099+K04456
Organismal Systems	Aging	Longevity regulating pathway - mammal	1	95	0.505277	0.62949	ko04211	ENSG00000117020	K04456
Cellular Processes	Transport and catabolism	Phagosome	2	230	0.506778	0.62949	ko04145	ENSG00000158270;ENSG00000260314	K10062+K06560
Environmental Information Processing	Signal transduction	TGF-beta signaling pathway	1	96	0.50895	0.62949	ko04350	ENSG00000100393	K04498
Organismal Systems	Immune system	IL-17 signaling pathway	1	97	0.512596	0.629856	ko04657	ENSG00000125538	K04519
Human Diseases	Neurodegenerative disease	Spinocerebellar ataxia	1	100	0.523374	0.638924	ko05017	ENSG00000117020	K04456
Organismal Systems	Environmental adaptation	Circadian entrainment	1	102	0.530429	0.639235	ko04713	ENSG00000198838	K04963
Organismal Systems	Endocrine system	Melanogenesis	1	102	0.530429	0.639235	ko04916	ENSG00000100393	K04498
Organismal Systems	Sensory system	Inflammatory mediator regulation of TRP channels	1	103	0.533918	0.639341	ko04750	ENSG00000125538	K04519
Human Diseases	Infectious diseases	African trypanosomiasis	1	108	0.550984	0.655223	ko05143	ENSG00000125538	K04519
Organismal Systems	Endocrine system	Parathyroid hormone synthesis, secretion and action	1	109	0.554322	0.655223	ko04928	ENSG00000120738	K09203
Organismal Systems	Endocrine system	Progesterone-mediated oocyte maturation	1	110	0.557636	0.655223	ko04914	ENSG00000117020	K04456
Organismal Systems	Immune system	Th17 cell differentiation	1	113	0.567434	0.658504	ko04659	ENSG00000125538	K04519
Human Diseases	Infectious diseases	Toxoplasmosis	1	113	0.567434	0.658504	ko05145	ENSG00000117020	K04456
Human Diseases	Immune diseases	Primary immunodeficiency	1	116	0.577018	0.664599	ko05340	ENSG00000196839	K01488
Organismal Systems	Immune system	Leukocyte transendothelial migration	1	118	0.583292	0.664599	ko04670	ENSG00000183230	K05691
Organismal Systems	Nervous system	Cholinergic synapse	1	118	0.583292	0.664599	ko04725	ENSG00000117020	K04456
Organismal Systems	Immune system	Intestinal immune network for IgA production	1	123	0.598577	0.675953	ko04672	ENSG00000102524	K05476
Environmental Information Processing	Signal transduction	Calcium signaling pathway	2	273	0.600447	0.675953	ko04020	ENSG00000198838;ENSG00000109689	K04963+K18196
Human Diseases	Infectious diseases	Epstein-Barr virus infection	2	282	0.618323	0.688651	ko05169	ENSG00000111276;ENSG00000117020	K06624+K04456
Organismal Systems	Immune system	Platelet activation	1	130	0.619054	0.688651	ko04611	ENSG00000117020	K04456
Human Diseases	Infectious diseases	Pathogenic Escherichia coli infection	2	285	0.624148	0.689896	ko05130	ENSG00000125538;ENSG00000197535	K04519+K10357
Human Diseases	Cardiovascular diseases	Viral myocarditis	1	133	0.627512	0.689896	ko05416	ENSG00000105974	K06278
Organismal Systems	Nervous system	Dopaminergic synapse	1	138	0.6412	0.700608	ko04728	ENSG00000117020	K04456
Genetic Information Processing	Translation	Ribosome	1	142	0.651793	0.700608	ko03010	ENSG00000185414	K02907
Cellular Processes	Cell growth and death	Apoptosis	1	142	0.651793	0.700608	ko04210	ENSG00000117020	K04456
Genetic Information Processing	Transcription	Spliceosome	1	143	0.654393	0.700608	ko03040	ENSG00000111196	K12877
Environmental Information Processing	Signaling molecules and interaction	Cytokine-cytokine receptor interaction	2	302	0.655889	0.700608	ko04060	ENSG00000102524;ENSG00000125538	K05476+K04519
Cellular Processes	Cell growth and death	Necroptosis	1	167	0.711365	0.753613	ko04217	ENSG00000125538	K04519
Human Diseases	Cardiovascular diseases	Dilated cardiomyopathy (DCM)	1	168	0.713527	0.753613	ko05414	ENSG00000166862	K04867
Organismal Systems	Immune system	Hematopoietic cell lineage	1	173	0.724099	0.760506	ko04640	ENSG00000125538	K04519
Environmental Information Processing	Signal transduction	cGMP - PKG signaling pathway	1	175	0.728219	0.760584	ko04022	ENSG00000117020	K04456
Human Diseases	Infectious diseases	Amoebiasis	1	177	0.732279	0.760599	ko05146	ENSG00000125538	K04519
Organismal Systems	Immune system	NOD-like receptor signaling pathway	1	184	0.746024	0.770618	ko04621	ENSG00000125538	K04519
Organismal Systems	Immune system	Natural killer cell mediated cytotoxicity	1	188	0.753564	0.774153	ko04650	ENSG00000115904	K03099
Human Diseases	Substance dependence	Alcoholism	1	195	0.766234	0.782891	ko05034	ENSG00000115904	K03099
Organismal Systems	Environmental adaptation	Thermogenesis	1	246	0.841078	0.854717	ko04714	ENSG00000115904	K03099
Human Diseases	Cancers	Transcriptional misregulation in cancers	1	268	0.865551	0.874858	ko05202	ENSG00000111276	K06624
Human Diseases	Neurodegenerative diseases	Huntington disease	1	288	0.884559	0.889289	ko05016	ENSG00000100393	K04498
Environmental Information Processing	Signaling molecules and interaction	Neuroactive ligand-receptor interaction	1	352	0.929302	0.929302	ko04080	ENSG00000157005	K05237
